# Supplementary material
Source: PubMed Central journal article supplement (PMC33487)
Supplement: pnas_101126398_1.pdf [file pnas_101126398_1.pdf]

**Table 1.** Pharmacological characteristics of the response evoked by iontophoresis glutamate application on the mitral cell lateral dendrites

| <b>Drugs</b>   | <b>Activity</b>                | <b>Effects</b>   | <b>Concentrations</b> | <b>No.</b> |
|----------------|--------------------------------|------------------|-----------------------|------------|
| D,L-AP 5       | Glutamate site antagonist      | No blockade      | 100-700 $\mu$ M       | <b>32</b>  |
| D,L-AP 7       | Glutamate site antagonist      | No blockade      | 100 $\mu$ M           | <b>3</b>   |
| CPP            | Glutamate site antagonist      | Partial blockade | 10-50 $\mu$ M         | <b>5</b>   |
| LY 235959      | Glutamate site antagonist      | Blockade         | 25-50 $\mu$ M         | <b>3</b>   |
| 5,7 dCK        | Glycine site antagonist        | Blockade         | 15-30 $\mu$ M         | <b>45</b>  |
| Kynurenic acid | Glycine site antagonist        | Blockade         | 5 mM                  | <b>6</b>   |
| Magnesium      | Pore blocker                   | Blockade         | 1.3 mM                | <b>10</b>  |
| MK 801         | Pore blocker                   | Blockade         | 25 $\mu$ M            | <b>12</b>  |
| D-Serine       | Potentiator, acts glycine site | Potentiation     | 10-50 $\mu$ M         | <b>3</b>   |

Cells were recorded at -60 mV in presence of 0 Mg<sup>2+</sup>, TTX, BMI, PTX, and NBQX.
