# Supplementary material
Source: PubMed Central journal article supplement (PMC33487)

# A

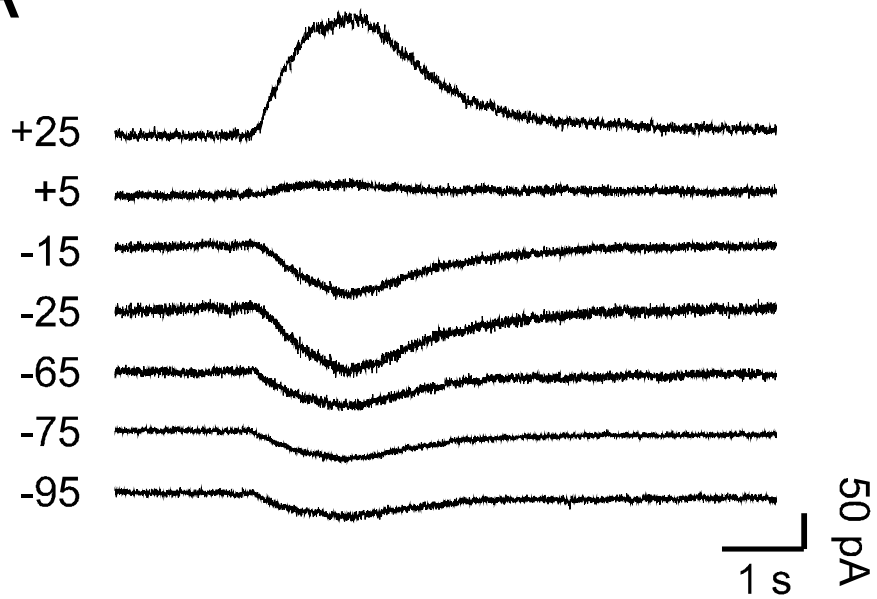

# B

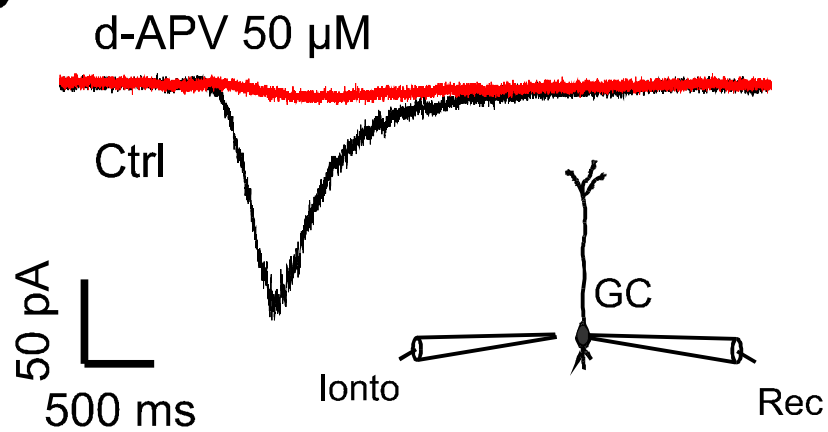

Supplement: pnas_101126398_3.pdf [file pnas_101126398_3.pdf]

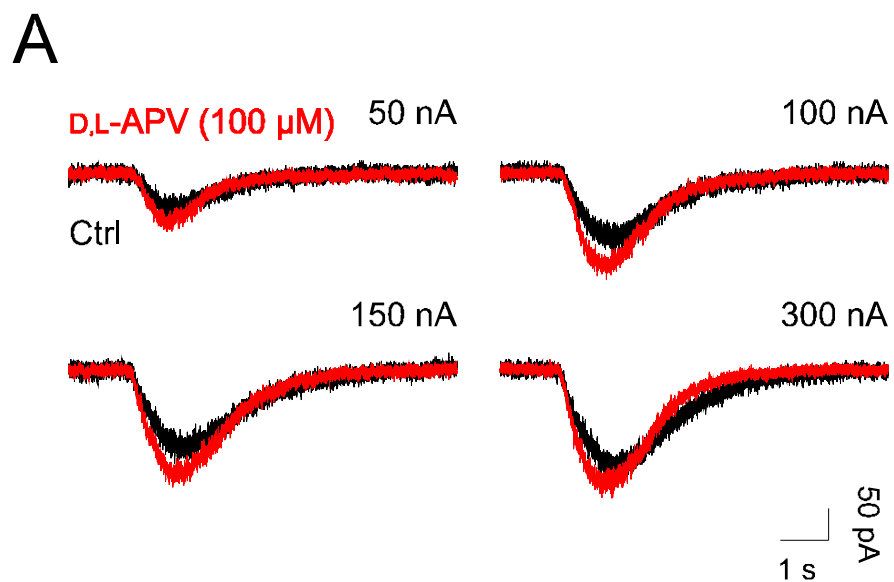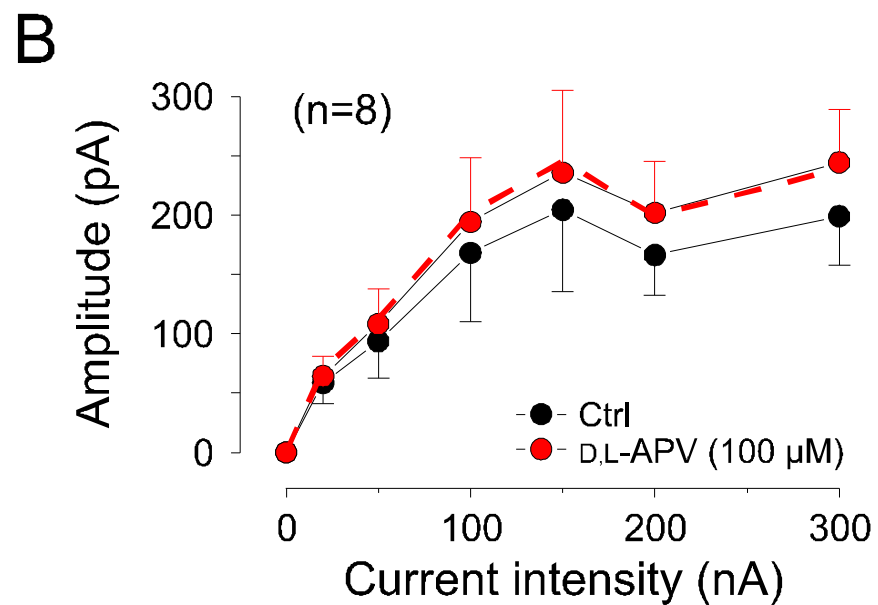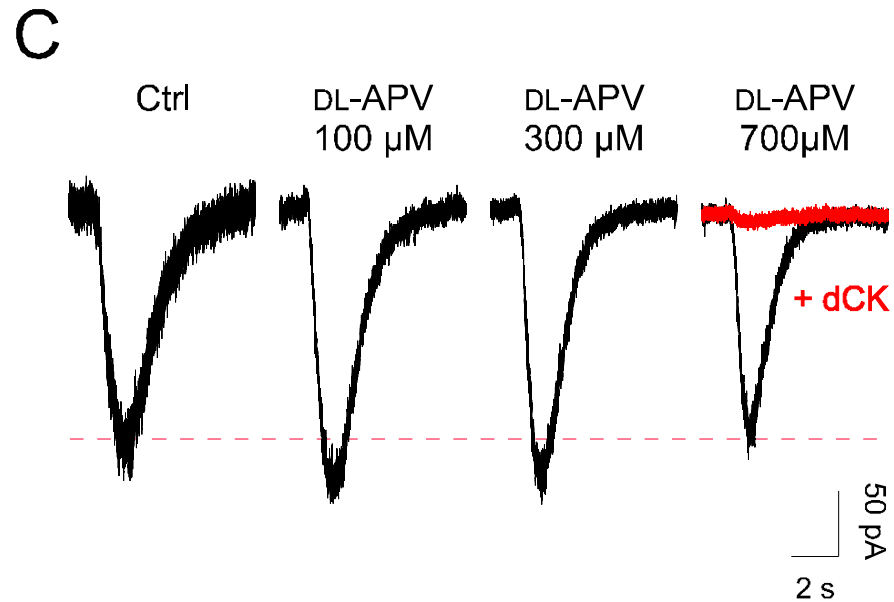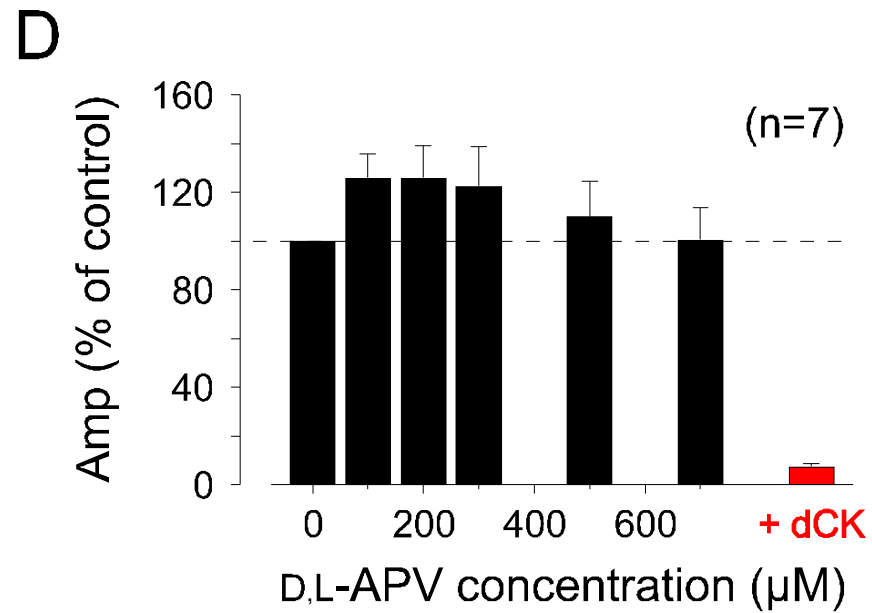

Supplement: pnas_101126398_5.pdf [file pnas_101126398_5.pdf]

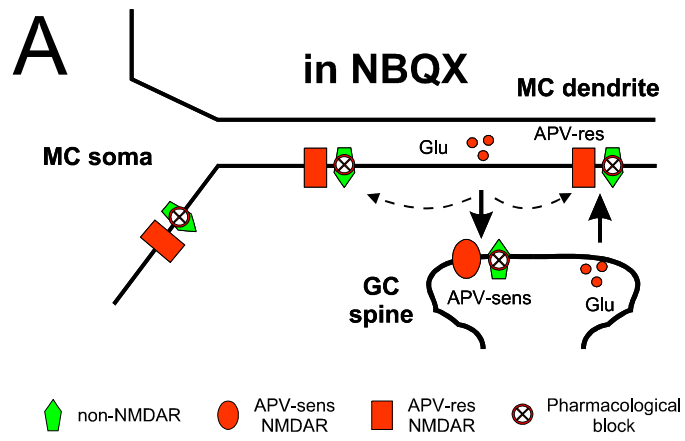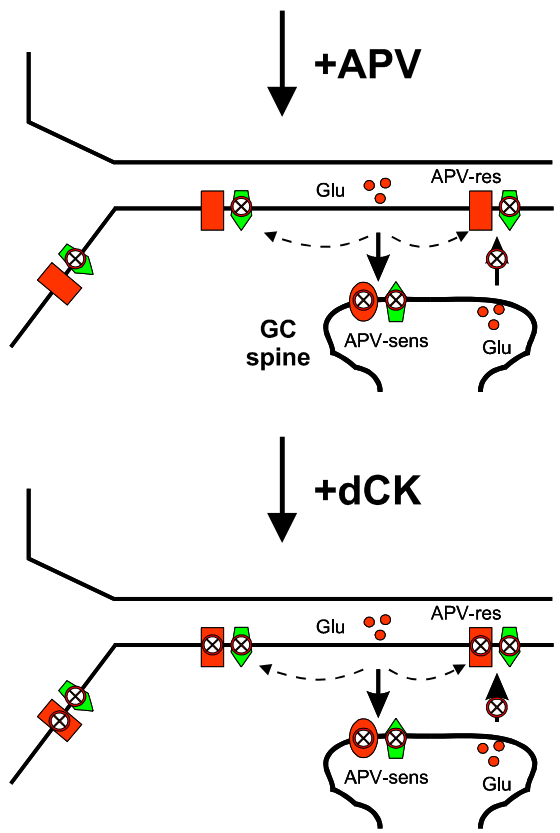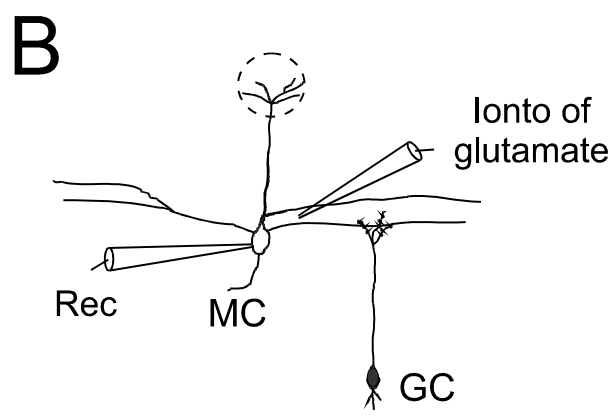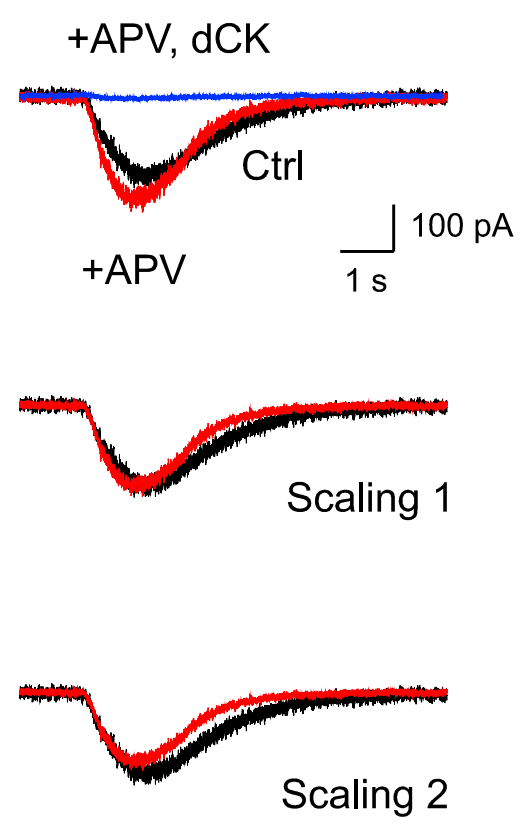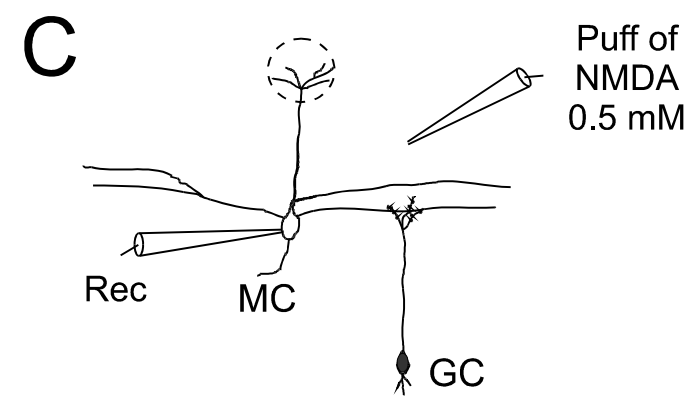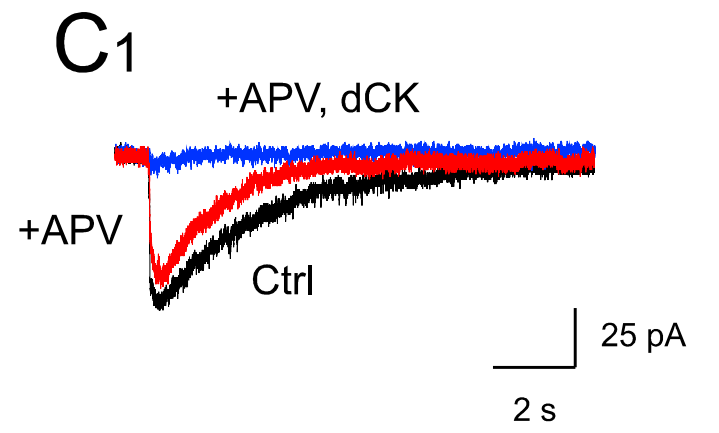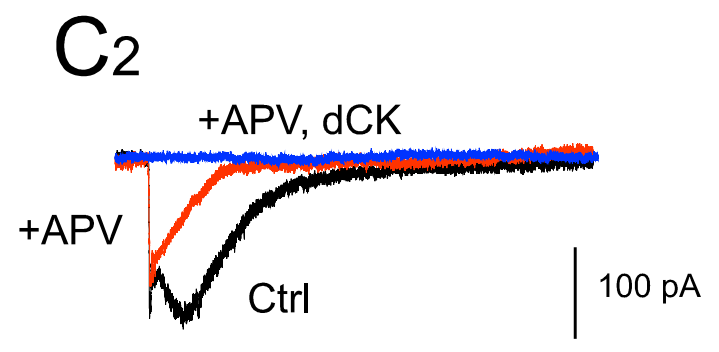

Supplement: pnas_101126398_7.pdf [file pnas_101126398_7.pdf]
